# Supplementary material for: Systematic literature review of domains assessed in psoriatic arthritis to inform the update of the psoriatic arthritis core domain set
Source: PubMed Central journal article supplement — RMD Open. 2016 Mar 3;2(1):e000217. doi: 10.1136/rmdopen-2015-000217 (PMC4780312; doi:10.1136/rmdopen-2015-000217), 2016-03-03
Supplement: rmdopen-2015-000217supp_references.pdf [file rmdopen-2015-000217supp_references.pdf]

## Supplemental References

### PsA Randomized Controlled Trials Reported 2010 - 2015

We included 41 full text articles representing 20 distinct RCTs (1-22).

### PsA Longitudinal Observational Studies and Registries Reported 2010 - 2015

Searches and review of reference lists identified 27 LOS (23-49) and 12 registries (50-61).

1. Kavanaugh A, Menter A, Mendelsohn A, Shen YK, Lee S, Gottlieb AB. Effect of ustekinumab on physical function and health-related quality of life in patients with psoriatic arthritis: a randomized, placebo-controlled, phase II trial. *Current medical research and opinion*. 2010;26(10):2385-92.
2. Mease PJ, Wei N, Fudman EJ, Kivitz AJ, Schechtman J, Trapp RG, et al. Safety, tolerability, and clinical outcomes after intraarticular injection of a recombinant adeno-associated vector containing a tumor necrosis factor antagonist gene: results of a phase 1/2 Study. *The Journal of rheumatology*. 2010;37(4):692-703.
3. Sterry W, Ortonne JP, Kirkham B, Brocq O, Robertson D, Pedersen RD, et al. Comparison of two etanercept regimens for treatment of psoriasis and psoriatic arthritis: PRESTA randomised double blind multicentre trial. *BMJ*. 2010;340:c147.
4. Torii H, Nakagawa H. Infliximab monotherapy in Japanese patients with moderate-to-severe plaque psoriasis and psoriatic arthritis. A randomized, double-blind, placebo-controlled multicenter trial. *J Dermatol Sci*. 2010;59(1):40-9.
5. Atzeni F, Boccassini L, Antivalle M, Salaffi F, Sarzi-Puttini P. Etanercept plus ciclosporin versus etanercept plus methotrexate for maintaining clinical control over psoriatic arthritis: a randomised pilot study. *Annals of the rheumatic diseases*. 2011;70(4):712-4.
6. McQueen F, Lloyd R, Doyle A, Robinson E, Lobo M, Exeter M, et al. Zoledronic acid does not reduce MRI erosive progression in PsA but may suppress bone oedema: the Zoledronic Acid in Psoriatic Arthritis (ZAPA) Study. *Annals of the rheumatic diseases*. 2011;70(6):1091-4.
7. Mease P, Genovese MC, Gladstein G, Kivitz AJ, Ritchlin C, Tak PP, et al. Abatacept in the treatment of patients with psoriatic arthritis: results of a six-month, multicenter, randomized, double-blind, placebo-controlled, phase II trial. *Arthritis and rheumatism*. 2011;63(4):939-48.
8. Baranaukaite A, Raffayova H, Kungurov NV, Kubanova A, Venalis A, Helmle L, et al. Infliximab plus methotrexate is superior to methotrexate alone in the treatment of psoriatic arthritis in methotrexate-naive patients: the RESPOND study. *Annals of the rheumatic diseases*. 2012;71(4):541-8.
9. Kavanaugh A, van der Heijde D, McInnes IB, Mease P, Krueger GG, Gladman DD, et al. Golimumab in psoriatic arthritis: one-year clinical efficacy, radiographic, and safety results from a phase III, randomized, placebo-controlled trial. *Arthritis and rheumatism*. 2012;64(8):2504-17.

10. Kingsley GH, Kowalczyk A, Taylor H, Ibrahim F, Packham JC, McHugh NJ, et al. A randomized placebo-controlled trial of methotrexate in psoriatic arthritis. *Rheumatology (Oxford, England)*. 2012;51(8):1368-77.
11. Schett G, Wollenhaupt J, Papp K, Joos R, Rodrigues JF, Vessey AR, et al. Oral apremilast in the treatment of active psoriatic arthritis: results of a multicenter, randomized, double-blind, placebo-controlled study. *Arthritis and rheumatism*. 2012;64(10):3156-67.
12. Coates LC, Navarro-Coy N, Brown SR, Brown S, McParland L, Collier H, et al. The TICOPA protocol (Tight COntrol of Psoriatic Arthritis): a randomised controlled trial to compare intensive management versus standard care in early psoriatic arthritis. *BMC musculoskeletal disorders*. 2013;14:101.
13. McInnes IB, Kavanaugh A, Gottlieb AB, Puig L, Rahman P, Ritchlin C, et al. Efficacy and safety of ustekinumab in patients with active psoriatic arthritis: 1 year results of the phase 3, multicentre, double-blind, placebo-controlled PSUMMIT 1 trial. *Lancet (London, England)*. 2013;382(9894):780-9.
14. Gronning K, Rannestad T, Skomsvoll JF, Rygg LO, Steinsbekk A. Long-term effects of a nurse-led group and individual patient education programme for patients with chronic inflammatory polyarthritis - a randomised controlled trial. *Journal of clinical nursing*. 2014;23(7-8):1005-17.
15. Kavanaugh A, Mease PJ, Gomez-Reino JJ, Adebajo AO, Wollenhaupt J, Gladman DD, et al. Treatment of psoriatic arthritis in a phase 3 randomised, placebo-controlled trial with apremilast, an oral phosphodiesterase 4 inhibitor. *Annals of the rheumatic diseases*. 2014;73(6):1020-6.
16. McInnes IB, Sieper J, Braun J, Emery P, van der Heijde D, Isaacs JD, et al. Efficacy and safety of secukinumab, a fully human anti-interleukin-17A monoclonal antibody, in patients with moderate-to-severe psoriatic arthritis: a 24-week, randomised, double-blind, placebo-controlled, phase II proof-of-concept trial. *Annals of the rheumatic diseases*. 2014;73(2):349-56.
17. D'Agostino MA, Boers M, Kirwan J, van der Heijde D, Ostergaard M, Schett G, et al. Updating the OMERACT filter: implications for imaging and soluble biomarkers. *The Journal of rheumatology*. 2014;41(5):1016-24.
18. Mease PJ, Genovese MC, Greenwald MW, Ritchlin CT, Beaulieu AD, Deodhar A, et al. Brodalumab, an anti-IL17RA monoclonal antibody, in psoriatic arthritis. *The New England journal of medicine*. 2014;370(24):2295-306.
19. Ritchlin C, Rahman P, Kavanaugh A, McInnes IB, Puig L, Li S, et al. Efficacy and safety of the anti-IL-12/23 p40 monoclonal antibody, ustekinumab, in patients with active psoriatic arthritis despite conventional non-biological and biological anti-tumour necrosis factor therapy: 6-month and 1-year results of the phase 3, multicentre, double-blind, placebo-controlled, randomised PSUMMIT 2 trial. *Ann Rheum Dis*. 2014;73(6):990-9.
20. Cozzi F, Raffeiner B, Beltrame V, Ciprian L, Coran A, Botsios C, et al. Effects of mud-bath therapy in psoriatic arthritis patients treated with TNF inhibitors. Clinical evaluation and assessment of synovial inflammation by contrast-enhanced ultrasound (CEUS). *Joint, bone, spine : revue du rhumatisme*. 2015;82(2):104-8.
21. Mease PJ, McInnes IB, Kirkham B, Kavanaugh A, Rahman P, van der Heijde D, et al. Secukinumab Inhibition of Interleukin-17A in Patients with Psoriatic Arthritis. *The New England journal of medicine*. 2015;373(14):1329-39.
22. McInnes IB, Mease PJ, Kirkham B, Kavanaugh A, Ritchlin CT, Rahman P, et al. Secukinumab, a human anti-interleukin-17A monoclonal antibody, in patients with psoriatic arthritis (FUTURE 2): a randomised, double-blind, placebo-controlled, phase 3 trial. *Lancet (London, England)*. 2015.
23. Gladman DD, Chandran V. Observational cohort studies: lessons learnt from the University of Toronto Psoriatic Arthritis Program. *Rheumatology (Oxford, England)*. 2011;50(1):25-31.
24. Scarpa R, Atteno M, Lubrano E, Provenzano G, D'Angelo S, Spadaro A, et al. The effectiveness and safety of TNF-alpha blockers in the treatment of early psoriatic arthritis: an Italian multicentre longitudinal observational pilot study. *Clin Rheumatol*. 2011;30(8):1063-7.

25. Busquets-Perez N, Rodriguez-Moreno J, Gomez-Vaquero C, Nolla-Sole JM. Relationship between psoriatic arthritis and moderate-severe psoriasis: analysis of a series of 166 psoriatic arthritis patients selected from a hospital population. *Clinical rheumatology*. 2012;31(1):139-43.
26. Dandorfer SW, Rech J, Manger B, Schett G, Englbrecht M. Differences in the patient's and the physician's perspective of disease in psoriatic arthritis. *Semin Arthritis Rheum*. 2012;42(1):32-41.
27. Esposito M, Giunta A, Mazzotta A, Zangrilli A, Babino G, Bavetta M, et al. Efficacy and safety of subcutaneous anti-tumor necrosis factor-alpha agents, etanercept and adalimumab, in elderly patients affected by psoriasis and psoriatic arthritis: an observational long-term study. *Dermatology (Basel, Switzerland)*. 2012;225(4):312-9.
28. Jajic Z, Rajnpreht I, Kovacic N, Lukic IK, Velagic V, Grubisic F, et al. Which clinical variables have the most significant correlation with quality of life evaluated by SF-36 survey in Croatian cohort of patient with ankylosing spondylitis and psoriatic arthritis? *Rheumatol Int*. 2012;32(11):3471-9.
29. Skare TL, Leite N, Bortoluzzo AB, Goncalves CR, da Silva JA, Ximenes AC, et al. Effect of age at disease onset in the clinical profile of spondyloarthritis: a study of 1424 Brazilian patients. *Clin Exp Rheumatol*. 2012;30(3):351-7.
30. Behrens F, Finkenwirth C, Pavelka K, Stolfa J, Sipek-Dolnicar A, Thaci D, et al. Leflunomide in psoriatic arthritis: results from a large European prospective observational study. *Arthritis care & research*. 2013;65(3):464-70.
31. Castrejon I, Yazici Y, Pincus T. Patient self-report RADAI (Rheumatoid Arthritis Disease Activity Index) joint counts on an MDHAQ (Multidimensional Health Assessment Questionnaire) in usual care of consecutive patients with rheumatic diseases other than rheumatoid arthritis. *Arthritis Care Res (Hoboken)*. 2013;65(2):288-93.
32. Coates LC, FitzGerald O, Gladman DD, McHugh N, Mease P, Strand V, et al. Reduced joint counts misclassify patients with oligoarticular psoriatic arthritis and miss significant numbers of patients with active disease. *Arthritis and rheumatism*. 2013;65(6):1504-9.
33. Iannone F, Fanizzi R, Scioscia C, Anelli MG, Lapadula G. Body mass does not affect the remission of psoriatic arthritis patients on anti-TNF-alpha therapy. *Scandinavian journal of rheumatology*. 2013;42(1):41-4.
34. Paramarta JE, De Rycke L, Ambarus CA, Tak PP, Baeten D. Undifferentiated spondyloarthritis vs ankylosing spondylitis and psoriatic arthritis: a real-life prospective cohort study of clinical presentation and response to treatment. *Rheumatology (Oxford, England)*. 2013;52(10):1873-8.
35. Freeston JE, Coates LC, Nam JL, Moverley AR, Hensor EM, Wakefield RJ, et al. Is there subclinical synovitis in early psoriatic arthritis? A clinical comparison with gray-scale and power Doppler ultrasound. *Arthritis care & research*. 2014;66(3):432-9.
36. Kerr GS, Qaiyumi S, Richards J, Vahabzadeh-Monshie H, Kindred C, Whelton S, et al. Psoriasis and psoriatic arthritis in African-American patients-the need to measure disease burden. *Clinical rheumatology*. 2014.
37. Theander E, Husmark T, Alenius GM, Larsson PT, Teleman A, Geijer M, et al. Early psoriatic arthritis: short symptom duration, male gender and preserved physical functioning at presentation predict favourable outcome at 5-year follow-up. Results from the Swedish Early Psoriatic Arthritis Register (SwePsA). *Ann Rheum Dis*. 2014;73(2):407-13.
38. Vogelzang EH, Kneepkens EL, Nurmohamed MT, van Kuijk AW, Rispens T, Wolbink G, et al. Anti-adalimumab antibodies and adalimumab concentrations in psoriatic arthritis; an association with disease activity at 28 and 52 weeks of follow-up. *Annals of the rheumatic diseases*. 2014;73(12):2178-82.
39. Walsh JA, McFadden ML, Morgan MD, Sawitzke AD, Duffin KC, Krueger GG, et al. Work productivity loss and fatigue in psoriatic arthritis. *J Rheumatol*. 2014;41(8):1670-4.

40. Bremander A, Jacobsson LT, Bergman S, Haglund E, Lofvendahl S, Petersson IF. Smoking is associated with a worse self-reported health status in patients with psoriatic arthritis: data from a Swedish population-based cohort. *Clin Rheumatol*. 2015;34(3):579-83.
41. Castaneda S, Martin-Martinez MA, Gonzalez-Juanatey C, Llorca J, Garcia-Yebenes MJ, Perez-Vicente S, et al. Cardiovascular morbidity and associated risk factors in Spanish patients with chronic inflammatory rheumatic diseases attending rheumatology clinics: Baseline data of the CARMA Project. *Seminars in arthritis and rheumatism*. 2015;44(6):618-26.
42. Dalal DS, Lin YC, Brennan DM, Borkar N, Korman N, Husni ME. Quantifying harmful effects of psoriatic diseases on quality of life: Cardio-metabolic outcomes in psoriatic arthritis study (COMPASS). *Seminars in arthritis and rheumatism*. 2015;44(6):641-5.
43. El Miedany Y, El Gaafary M, Youssef S, Ahmed I, Nasr A. Tailored approach to early psoriatic arthritis patients: clinical and ultrasonographic predictors for structural joint damage. *Clinical rheumatology*. 2015;34(2):307-13.
44. Giacomelli R, Gorla R, Trotta F, Tirri R, Grassi W, Bazzichi L, et al. Quality of life and unmet needs in patients with inflammatory arthropathies: results from the multicentre, observational RAPSODIA study. *Rheumatology (Oxford)*. 2015;54(5):792-7.
45. Haroon M, Gallagher P, FitzGerald O. Diagnostic delay of more than 6 months contributes to poor radiographic and functional outcome in psoriatic arthritis. *Annals of the rheumatic diseases*. 2015;74(6):1045-50.
46. Jadon DR, Shaddick G, Tillett W, Korendowych E, Robinson G, Waldron N, et al. Psoriatic Arthritis Mutilans: Characteristics and Natural Radiographic History. *The Journal of rheumatology*. 2015;42(7):1169-76.
47. Kilic G, Kilic E, Nas K, Karkucak M, Capkin E, Dagli AZ, et al. Comparison of ASDAS and BASDAI as a measure of disease activity in axial psoriatic arthritis. *Clin Rheumatol*. 2015;34(3):515-21.
48. Shen J, Shang Q, Li EK, Leung YY, Kun EW, Kwok LW, et al. Cumulative inflammatory burden is independently associated with increased arterial stiffness in patients with psoriatic arthritis: a prospective study. *Arthritis research & therapy*. 2015;17:75.
49. Tillett W, Shaddick G, Askari A, Cooper A, Creamer P, Clunie G, et al. Factors influencing work disability in psoriatic arthritis: first results from a large UK multicentre study. *Rheumatology (Oxford)*. 2015;54(1):157-62.
50. Saad AA, Ashcroft DM, Watson KD, Symmons DP, Noyce PR, Hyrich KL. Efficacy and safety of anti-TNF therapies in psoriatic arthritis: an observational study from the British Society for Rheumatology Biologics Register. *Rheumatology (Oxford, England)*. 2010;49(4):697-705.
51. Virkki LM, Sumathikutty BC, Aarnio M, Valleala H, Heikkila R, Kauppi M, et al. Biological therapy for psoriatic arthritis in clinical practice: outcomes up to 2 years. *J Rheumatol*. 2010;37(11):2362-8.
52. Leffers HC, Ostergaard M, Grintborg B, Krogh NS, Foged H, Tarp U, et al. Efficacy of abatacept and tocilizumab in patients with rheumatoid arthritis treated in clinical practice: results from the nationwide Danish DANBIO registry. *Annals of the rheumatic diseases*. 2011;70(7):1216-22.
53. Saougou I, Markatseli TE, Papagoras C, Voulgari PV, Alamanos Y, Drosos AA. Sustained clinical response in psoriatic arthritis patients treated with anti-TNF agents: a 5-year open-label observational cohort study. *Seminars in arthritis and rheumatism*. 2011;40(5):398-406.
54. Carneiro S, Bortoluzzo A, Goncalves C, Silva JA, Ximenes AC, Bertolo M, et al. Effect of enthesitis on 1505 Brazilian patients with spondyloarthritis. *The Journal of rheumatology*. 2013;40(10):1719-25.
55. Fagerli KM, Lie E, van der Heijde D, Heiberg MS, Kalstad S, Rodevand E, et al. Switching between TNF inhibitors in psoriatic arthritis: data from the NOR-DMARD study. *Annals of the rheumatic diseases*. 2013;72(11):1840-4.

56. Kristensen LE, Englund M, Neovius M, Askling J, Jacobsson LT, Petersson IF. Long-term work disability in patients with psoriatic arthritis treated with anti-tumour necrosis factor: a population-based regional Swedish cohort study. *Ann Rheum Dis*. 2013;72(10):1675-9.
57. Chen JS, Makovey J, Lassere M, Buchbinder R, March LM. Comparative effectiveness of anti-tumor necrosis factor drugs on health-related quality of life among patients with inflammatory arthritis. *Arthritis Care Res (Hoboken)*. 2014;66(3):464-72.
58. Labitigan M, Bahce-Altuntas A, Kremer JM, Reed G, Greenberg JD, Jordan N, et al. Higher rates and clustering of abnormal lipids, obesity, and diabetes mellitus in psoriatic arthritis compared with rheumatoid arthritis. *Arthritis care & research*. 2014;66(4):600-7.
59. Iannone F, Lopriore S, Bucci R, Scioscia C, Anelli MG, Notarnicola A, et al. Two-year survival rates of anti-TNF-alpha therapy in psoriatic arthritis (PsA) patients with either polyarticular or oligoarticular PsA. *Scandinavian journal of rheumatology*. 2015;44(3):192-9.
60. Martins FM, da Silva JA, Santos MJ, Vieira-Sousa E, Duarte C, Santos H, et al. DAS28, CDAI and SDAI cut-offs do not translate the same information: results from the Rheumatic Diseases Portuguese Register Reuma.pt. *Rheumatology (Oxford, England)*. 2015;54(2):286-91.
61. Kalyoncu U, Kadarag O, Kilic L, Bilgen SA, Akdogan A, Kiraz S, et al. Patients with psoriatic arthritis had better TNF I survival than ankylosing spondylitis: HUR-BIO real life results. *Annals of the rheumatic diseases*. 2014;73((Suppl2)):744.
