# Supplementary material for: Systematic literature review of domains assessed in psoriatic arthritis to inform the update of the psoriatic arthritis core domain set
Source: PubMed Central journal article supplement — RMD Open. 2016 Mar 3;2(1):e000217. doi: 10.1136/rmdopen-2015-000217 (PMC4780312; doi:10.1136/rmdopen-2015-000217), 2016-03-03
Supplement: rmdopen-2015-000217supp_table.pdf [file rmdopen-2015-000217supp_table.pdf]

**Table 2a: Domains and Corresponding Outcome Measures in PsA Randomized Controlled Trials, Longitudinal Observational Studies and Registries in 2010-2015**

| 2006 PsA Core Domain Set (8) | Domains                          | Outcome Measures Number/Domain                   | Studies assessing each Domain and Outcome |                                                           |                   | Overlap with patient PsAID domains |
|------------------------------|----------------------------------|--------------------------------------------------|-------------------------------------------|-----------------------------------------------------------|-------------------|------------------------------------|
|                              |                                  |                                                  | Randomized Controlled Trials (N=22)       | Measure n(%)<br>Longitudinal Observational Studies (N=27) | Registries (N=12) |                                    |
| Inner Circle                 | <b>Pain</b>                      | <b>8</b>                                         | <b>22 (100)</b>                           | <b>18 (66.7)</b>                                          | <b>8 (66.7)</b>   | <b>Yes</b>                         |
|                              | Pain                             | Patient assessment of pain (VAS)                 | 17 (77.3)                                 | 15 (83.3)                                                 | 8 (100)           |                                    |
|                              |                                  | Patient assessment of arthritis joint pain (VAS) | 4 (18.2)                                  | 0                                                         | 1                 |                                    |
|                              |                                  | Arthritis Self Efficacy Scale-Pain (ASES-Pain)   | 1 (4.5)                                   | 0                                                         | 0                 |                                    |
|                              |                                  | Arthritis Self Efficacy Scale-Pain (ASES-Pain)   | 1 (4.5)                                   | 0                                                         | 0                 |                                    |
|                              |                                  | Arthritis Impact Measurement Scales (AIMS2)      | 0                                         | 1 (5.6)                                                   | 0                 |                                    |
|                              |                                  | Arthritis Impact Measurement Scales (AIMS2)      | 0                                         | 1 (5.6)                                                   | 0                 |                                    |
|                              |                                  | Axial nocturnal pain (Y/N)                       | 0                                         | 1 (5.6)                                                   | 0                 |                                    |
|                              |                                  | Peripheral nocturnal pain (Y/N)                  | 0                                         | 1 (5.6)                                                   | 0                 |                                    |
|                              |                                  | Pain (11 point NRS)                              | 0                                         | 1 (5.6)                                                   | 0                 |                                    |
|                              |                                  | Pain (Likert 0-5)                                | 0                                         | 1 (5.6)                                                   | 0                 |                                    |
|                              | <b>Peripheral Joint Activity</b> | <b>14</b>                                        | <b>21 (95.4)</b>                          | <b>24 (88.9)</b>                                          | <b>10 (83.3)</b>  | <b>No</b>                          |
|                              | Peripheral Joint Activity        | SJC/TJC (66/68)                                  | 9 (42.8)                                  | 12 (50)                                                   | 3 (30)            |                                    |
|                              |                                  | SJC/TJC (count not reported)                     | 6 (28.6)                                  | 1 (4.2)                                                   | 1 (10)            |                                    |
|                              |                                  | SJC/TJC (76/78)                                  | 4 (19)                                    | 3 (12.5)                                                  | 0                 |                                    |
|                              |                                  | SJC/TJC (66/72)                                  | 1 (4.8)                                   | 0                                                         | 0                 |                                    |
|                              |                                  | SJC/TJC (28, grading 0 none to 3 severe)         | 1 (4.8)                                   | 1 (4.2)                                                   | 0                 |                                    |
|                              |                                  | SJC/TJC (28)                                     | 0                                         | 3 (12.5)                                                  | 6 (60)            |                                    |
|                              |                                  | SJC/TJC (28)                                     | 0                                         | 1 (4.2)                                                   | 0                 |                                    |
|                              | SJC/TJC (44)                     | 0                                                | 1 (4.2)                                   | 0                                                         |                   |                                    |
|                              | SJC/TJC (70/72)                  | 0                                                | 0                                         | 1 (10)                                                    |                   |                                    |
|                              | SJC/TJC (53/54)                  | 0                                                | 2 (8.3)                                   | 0                                                         |                   |                                    |
|                              | Active Joint Count (AJC)         | 0                                                | 4 (16.7)                                  | 1 (10)                                                    |                   |                                    |

|                            |                                                                               |           |                  |                  |                  |            |
|----------------------------|-------------------------------------------------------------------------------|-----------|------------------|------------------|------------------|------------|
|                            | Damaged/Deformed Joint Count                                                  | 0         | 1 (4.2)          | 0                |                  |            |
|                            | RADAI Self-Report Joint Count                                                 | 0         | 1 (4.2)          | 0                |                  |            |
|                            | Number of Painful Regions (0–18)                                              | 0         | 1 (4.2)          | 1                |                  |            |
|                            | BASDAI item #3 –Pain/Swelling Peripheral Joints                               |           |                  |                  |                  |            |
| <b>Physical Function</b>   |                                                                               | <b>8</b>  | <b>20 (90.9)</b> | <b>21 (77.8)</b> | <b>11 (91.7)</b> | <b>Yes</b> |
| Physical Function          | Health Assessment Questionnaire Disability Index (HAQ-DI)                     |           | 20 (100)         | 16 (76.2)        | 7 (63.6)         |            |
|                            | Disabilities of arm, shoulder and hand scale (DASH) -upper extremity function | 1 (5)     |                  | 0                | 0                |            |
|                            | Modified RA outcome score -lower extremity                                    | 1 (5)     |                  | 0                | 0                |            |
|                            | BASFI                                                                         | 0         |                  | 4 (19.0)         | 5 (45.4)         |            |
|                            | Modified HAQ (mHAQ)                                                           | 0         |                  | 1 (4.8)          | 2 (18.2)         |            |
|                            | Multidimensional health assessment questionnaire (MDHAQ)                      | 0         |                  | 2 (9.5)          | 0                |            |
|                            | Late Life Disability Instrument (LLDI)                                        | 0         |                  | 1 (4.8)          | 0                |            |
|                            | ACR functional class                                                          | 0         |                  | 0                | 1 (9.1)          |            |
| <b>Skin</b>                |                                                                               | <b>15</b> | <b>19 (86.4)</b> | <b>19 (70.4)</b> | <b>5 (41.7)</b>  | <b>Yes</b> |
| Skin: Physician Assessment | Psoriasis Area and Severity Index (PASI)                                      |           | 16 (84.2)        | 16 (84.2)        | 3 (75.0)         |            |
|                            | Psoriasis >3% Body Surface Area (BSA)                                         | 8 (42.1)  |                  | 0                | 0                |            |
|                            | Physician global assesment of psoriasis (0 clear to 5 severe)                 | 3 (15.8)  |                  | 2 (10.5)         | 1 (20)           |            |
|                            | Mean Body Surface Area                                                        | 3 (15.8)  |                  | 7 (36.8)         | 1(20)            |            |
|                            | Target psoriatic skin lesion score (0-12, 12 worse)                           | 2 (10.5)  |                  | 0                | 0                |            |
|                            | Physician Global Psoriasis Activity (VAS)                                     | 0         |                  | 2 (10.5)         | 0                |            |
|                            | NPF-PS Physician Global Assessment                                            | 0         |                  | 1 (5.3)          | 0                |            |
| Skin: Patient Assessment   | Physician Global Psoriasis Activity (VAS)                                     | 0         |                  | 1 (5.3)          | 0                |            |
|                            | NPF-PS Physician Global Assessment                                            | 1 (5.3)   |                  | 0                | 1 (20)           |            |
|                            |                                                                               | 1 (5.3)   |                  | 0                | 0                |            |
|                            |                                                                               | 1 (5.3)   |                  | 0                | 0                |            |

|                       |                                                                   |                   |                                |                  |                  |
|-----------------------|-------------------------------------------------------------------|-------------------|--------------------------------|------------------|------------------|
|                       | Physician Global Psoriatic Disease Activity (Skin and Nail) (VAS) | 1 (5.3)<br>0<br>0 | 5 (26.3)<br>1 (5.3)<br>1 (5.3) | 0<br>0<br>0      |                  |
|                       | Psoriasis Symptom Inventory (PSI)                                 | 0                 | 1 (5.3)                        | 0                |                  |
|                       | Patient General health -Psoriasis (VAS)                           |                   |                                |                  |                  |
|                       | Itch (VAS)                                                        |                   |                                |                  |                  |
|                       | Patient Global Psoriasis Activity (VAS)                           |                   |                                |                  |                  |
|                       | DLQI item #4 -Psoriasis Pain and Itch                             |                   |                                |                  |                  |
|                       | Patient Global Psoriatic Disease Activity (Skin and Nail) (VAS)   |                   |                                |                  |                  |
|                       | Patient Assessment Skin Status (Likert)                           |                   |                                |                  |                  |
| <b>Patient Global</b> |                                                                   | <b>9</b>          | <b>18 (81.8)</b>               | <b>20 (74.1)</b> | <b>10 (83.3)</b> |
| Patient Global        | Patient (global) Assesment of Disease Activity (VAS)              | 16 (88.9)         | 6 (30.0)                       | 1 (10)           | <b>No</b>        |
|                       | Patient Global Assessment (VAS)                                   | 5 (27.8)          | 10 (50.0)                      | 6 (60)           |                  |
|                       | Patient's Global Health Assessment (VAS)                          | 1 (5.6)           | 3 (15.0)                       | 4 (40)           |                  |
|                       | Patients Global Arthritis (Joint) Activity (VAS)                  | 1 (5.6)           | 4 (20.0)                       | 1(10)            |                  |
|                       | Patient Assessment of Target Joint (VAS)                          | 0                 | 0                              | 0                |                  |
|                       | Patient Global Score Psoriasis and Arthritis (VAS)                | 0                 | 1 (5.0)                        | 1 (10)           |                  |
|                       | Patient Global Status (Likert)                                    | 0                 | 1 (5.0)                        | 0                |                  |
|                       | Patient Global Health (NRS)                                       | 0                 | 1 (5.0)                        | 0                |                  |
|                       | Patient Global Rheumatic Disease Activity (VAS)                   | 0                 | 1 (5.0)                        | 0                |                  |
| <b>HRQL</b>           |                                                                   | <b>10</b>         | <b>17 (77.3)</b>               | <b>14 (51.8)</b> | <b>7 (58.3)</b>  |
| HRQL                  | Short Form-36 (SF-36)                                             | 12 (70.6)         | 8 (57.1)                       | 4 (66.7)         |                  |
|                       | DLQI                                                              | 6 (35.3)          | 5 (35.7)                       | 0                |                  |
|                       | Psoriatic Arthritis Quality of Life                               | 3 (17.6)          | 2 (14.3)                       | 0                |                  |

|                     |                                                               |           |                  |                  |                  |           |
|---------------------|---------------------------------------------------------------|-----------|------------------|------------------|------------------|-----------|
|                     | (PsAQoL)                                                      | 3 (17.6)  | 4 (28.6)         | 3 (42.8)         |                  |           |
|                     | Euro-Quality of Life (Euro-QoL)                               | 0         | 1 (7.1)          | 0                |                  |           |
|                     | Psoriasis index of quality of life (PSORIQoL)                 | 0         | 5 (35.7)         | 1 (16.7)         |                  |           |
|                     | Ankylosing spondylitis quality of life (ASQoL)                | 0         | 1 (7.1)          | 0                |                  |           |
|                     | Short Form-6D (SF-6D)                                         | 0         | 0                | 1 (16.7)         |                  |           |
|                     | Short Form 12 (SF-12)                                         |           |                  |                  |                  |           |
|                     | Illness Intrusiveness Scale (IIS)                             |           |                  |                  |                  |           |
|                     | Assessment of quality of life (AQoL)                          |           |                  |                  |                  |           |
| <b>Outer Circle</b> | <b>“Acute Phase Reactants”</b>                                | <b>2</b>  | <b>22 (100)</b>  | <b>20 (74.1)</b> | <b>10 (83.3)</b> | <b>No</b> |
|                     | Systemic Inflammation Markers                                 |           | 22 (100)         | 19 (95.0)        | 10 (100)         |           |
|                     | C-Reactive Protein (CRP)                                      |           | 10 (45.5)        | 18 (90.0)        | 9 (90)           |           |
|                     | Erythrocyte Sedimentation Rate (ESR)                          |           |                  |                  |                  |           |
|                     | <b>Physician Global</b>                                       | <b>10</b> | <b>18 (81.8)</b> | <b>13 (48.1)</b> | <b>7 (58.3)</b>  | <b>No</b> |
|                     | Physician Global                                              |           | 9 (50)           | 4 (30.8)         | 2 (28.6)         |           |
|                     | Physician (Global) Assessment of Disease Activity (VAS)       |           | 6 (33.3)         | 7 (53.8)         | 5 (71.4)         |           |
|                     | Physician Global Assessment (VAS)                             |           | 1 (5.6)          | 0                | 0                |           |
|                     | Physician Global Health Assessment (VAS)                      |           | 1 (5.6)          | 3 (23.1)         | 1 (14.3)         |           |
|                     | Physician’s Global Assessment of Arthritis -Joint (VAS)       |           | 1 (5.6)          | 0                | 0                |           |
|                     | Physician’s Global Assessment of Psoriasis (Likert)           |           | 1 (5.6)          | 0                | 0                |           |
|                     | Physician Global Assessment Response -Skin (Likert)           |           | 0                | 1 (7.7)          | 0                |           |
|                     | Physician Global Assessment of Psoriasis -Skin and Nail (VAS) |           | 0                | 1 (7.7)          | 0                |           |
|                     | Physician Global Score -Psoriasis and Arthritis (VAS)         |           | 0                | 0                | 1 (14.3)         |           |
|                     | Physician Global Status (Likert)                              |           |                  |                  |                  |           |
|                     | Physician Global Assessment of                                |           |                  |                  |                  |           |

|                   |                                                                       | Disease Activity (Likert) |                  |                  |                 |            |
|-------------------|-----------------------------------------------------------------------|---------------------------|------------------|------------------|-----------------|------------|
| <b>Enthesitis</b> |                                                                       | <b>10</b>                 | <b>13 (59.1)</b> | <b>12 (44.4)</b> | <b>3 (25.0)</b> | <b>No</b>  |
| Enthesitis        | Presence of enthesitis                                                |                           | 8 (61.5)         | 3 (25.0)         | 1 (33.3)        |            |
|                   | Leeds Enthesitis Index (LEI)                                          |                           | 4 (30.8)         | 2 (16.7)         | 0               |            |
|                   | Maastricht Ankylosing Spondylitis Enthesis Score (MASSES)             |                           | 3 (23.1)         | 4 (33.3)         | 2 (66.7)        |            |
|                   | Modified MASSES                                                       |                           | 3 (23.1)         | 0                | 0               |            |
|                   | Impact Index (0-4, Achilles Tendon, Plantar Fascia)                   |                           | 2 (15.4)         | 0                | 0               |            |
|                   | Spondyloarthritis Research Consortium of Canada Index (SPARCC)        |                           | 1 (7.7)          | 2 (16.7)         | 1 (33.3)        |            |
|                   | Future1 RCT Index (0-4, Lateral Epicondyle, Achilles Tendon)          |                           | 1 (7.7)          | 0                | 0               |            |
|                   | Enthesis count (0-13)                                                 |                           | 0                | 2 (16.7)         | 0               |            |
|                   | Enthesis count (0-8)                                                  |                           | 0                | 2 (16.7)         | 0               |            |
|                   | Tender enthesial count (total NR)                                     |                           | 0                | 1 (8.3)          | 0               |            |
|                   | Enthesial Pain (VAS)                                                  |                           | 0                | 1 (8.3)          | 0               |            |
| <b>Dactylitis</b> |                                                                       | <b>5</b>                  | <b>13 (59.1)</b> | <b>12 (44.4)</b> | <b>1 (8.3)</b>  | <b>No</b>  |
| Dactylitis        | Presence of dactylitis                                                |                           | 11 (84.6)        | 5 (41.7)         | 1 (100)         |            |
|                   | Dactylitis score (20 digits, graded 0 none to 3 severe, max score 60) |                           | 5 (38.4)         | 0                | 0               |            |
|                   | Dactylitis Score (maximum score 20)                                   |                           | 4 (30.8)         | 6 (50)           | 1 (100)         |            |
|                   | Leeds Dactylitis Index (LDI)                                          |                           | 3 (23.1)         | 3 (25.0)         | 0               |            |
|                   | Dactylitis Score (point scale 0 very good to 4 very severe)           |                           | 0                | 1 (8.3)          | 0               |            |
| <b>Fatigue</b>    |                                                                       | <b>10</b>                 | <b>7 (35)</b>    | <b>12 (44.4)</b> | <b>4 (33.3)</b> | <b>Yes</b> |
| Fatigue           | Fatigue/Tiredness (VAS)                                               |                           | 3 (43)           | 3 (25.0)         | 3 (75.0)        |            |
|                   | Functional Assessment of Chronic Illness Therapy (FACIT)              |                           | 3 (43)           | 3 (25.0)         | 0               |            |
|                   | Fatigue Assessment Scale (FAS)                                        |                           | 1 (14)           | 0                | 0               |            |
|                   | Modified Fatigue Severity Score (FSS)                                 |                           | 0                | 1 (8.3)          | 0               |            |
|                   | Bristol RA Fatigue (BRAFF) (NRS)                                      |                           | 0                | 1 (8.3)          | 0               |            |
|                   | Multidimensional assessment of                                        |                           | 0                | 1 (8.3)          | 0               |            |

|                     |                                                          |           |                 |                 |                 |
|---------------------|----------------------------------------------------------|-----------|-----------------|-----------------|-----------------|
|                     | fatigue (MAF)                                            | 0         | 3 (25.0)        | 1 (25.0)        |                 |
|                     | PsAQOL item 1 -Fatigue                                   | 0         | 1 (8.3)         | 0               |                 |
|                     | BASDAI item 1 -Fatigue/Tiredness                         | 0         | 1 (8.3)         | 0               |                 |
|                     | Fatigue (Likert)                                         |           |                 |                 |                 |
|                     | Fatigue (NRS)                                            |           |                 |                 |                 |
| <b>Nail</b>         |                                                          | <b>8</b>  | <b>5 (22.7)</b> | <b>8 (29.6)</b> | <b>1 (8.3)</b>  |
| Nail                | Modified Nail Psoriasis Severity                         | 2 (40)    | 3 (37.5)        | 0               |                 |
|                     | Index (NAPSI)                                            | 1 (20)    | 1 (12.5)        | 0               |                 |
|                     | Nail Psoriasis Severity Index (NAPSI)                    | 1 (20)    | 4 (50.0)        | 0               |                 |
|                     | Presence of Nail Involvement                             | 1 (20)    | 0               | 0               |                 |
|                     | Number of Fingernails Affected                           | 1 (20)    | 0               | 0               |                 |
|                     | Target NAPSI score                                       | 0         | 1 (12.5)        | 0               |                 |
|                     | Nail Disease Score                                       | 0         | 0               | 1 (100)         |                 |
|                     | Nail Lesion (Likert)                                     |           |                 |                 |                 |
|                     | Nail Psoriasis (VAS)                                     |           |                 |                 |                 |
| <b>Spine</b>        |                                                          | <b>11</b> | <b>4 (20)</b>   | <b>9 (33.3)</b> | <b>5 (41.7)</b> |
|                     | BASDAI                                                   | 4 (100)   | 8 (88.9)        | 5 (100)         |                 |
|                     | Ankylosing Spondylitis Disease Activity Score (ASDAS)    | 0         | 4 (44.4)        | 0               |                 |
|                     | Bath Ankylosing Spondylitis Patient Global Score (BAS-G) | 0         | 1 (11.1)        | 0               |                 |
|                     | Axial nocturnal pain (Y/N)                               | 0         | 1 (11.1)        | 0               |                 |
|                     | Clinical assessment of spinal pain (0-4)                 | 0         | 1 (11.1)        | 0               |                 |
|                     | Spinal pain (VAS)                                        | 0         | 0               | 1 (20)          |                 |
|                     | Spinal nocturnal pain (VAS)                              | 0         | 0               | 1 (20)          |                 |
|                     | Spinal mobility: modified Schober                        | 0         | 0               | 1 (20)          |                 |
|                     | Spinal mobility: occiput to wall                         | 0         | 0               | 1 (20)          |                 |
|                     | Spinal mobility: lateral lumbar flexion                  |           |                 |                 |                 |
| <b>"Radiology"</b>  |                                                          | <b>10</b> | <b>6 (27.3)</b> | <b>6 (22.2)</b> | <b>2 (16.7)</b> |
| Radiographic Damage | PsA Modified van der Heijde-Sharp (vdH-S) Score          | 6 (100)   | 2 (33.3)        | 0               |                 |
|                     | Modified Steinbrocker Scoring Method                     | 0         | 2 (33.3)        | 0               |                 |
|                     | Radiographic Erosion or                                  | 0         | 1 (16.7)        | 1 (50)          |                 |
|                     |                                                          | 0         | 2 (33.3)        | 0               |                 |
|                     |                                                          | 0         | 2 (33.3)        | 1 (50)          |                 |

|                            |                                                                         |                                                                           |                           |               |                 |                |           |            |
|----------------------------|-------------------------------------------------------------------------|---------------------------------------------------------------------------|---------------------------|---------------|-----------------|----------------|-----------|------------|
|                            |                                                                         | Osteolysis (Y/N)                                                          |                           |               |                 |                |           |            |
|                            |                                                                         | Ratingen Scoring System                                                   | 0                         | 1 (16.7)      | 1 (50)          |                |           |            |
|                            |                                                                         | Bath Ankylosing Spondylitis                                               |                           |               |                 |                |           |            |
|                            |                                                                         | Radiology Index (BASRI) -Spine                                            | 0                         | 1 (16.7)      | 1 (50)          |                |           |            |
|                            |                                                                         | Bath Ankylosing Spondylitis                                               |                           |               |                 |                |           |            |
|                            |                                                                         | Radiology Index (BASRI) -Hip                                              | 0                         | 1 (16.7)      | 0               |                |           |            |
|                            |                                                                         | Bath Ankylosing Spondylitis                                               |                           |               |                 |                |           |            |
|                            |                                                                         | Radiology Index (BASRI) -Total                                            | 0                         | 1 (16.7)      | 0               |                |           |            |
|                            |                                                                         | Modified Stoke Ankylosing                                                 |                           |               |                 |                |           |            |
|                            |                                                                         | Spondylitis Spine Score                                                   | 0                         | 1 (16.7)      | 0               |                |           |            |
|                            |                                                                         | (mSASSS)                                                                  |                           |               |                 |                |           |            |
|                            |                                                                         | Radiographic Ankylosing                                                   |                           |               |                 |                |           |            |
|                            |                                                                         | Spondylitis Spinal Score (RASSS)                                          |                           |               |                 |                |           |            |
|                            |                                                                         | Psoriatic Arthritis Spondylitis                                           |                           |               |                 |                |           |            |
|                            |                                                                         | Radiology Index (PASRI)                                                   |                           |               |                 |                |           |            |
| <b>Research<br/>Agenda</b> | <b>"MRI/CT/US"</b>                                                      |                                                                           | <b>9</b>                  | <b>4 (20)</b> | <b>4 (14.8)</b> | <b>1 (8.3)</b> | <b>No</b> |            |
|                            | Synovial, enthesal,<br>digital or spinal disease<br>activity and damage | Modified RA Magnetic Resonance<br>Imaging Scoring (mRAMRIS or<br>PsAMRIS) | 2 (50)                    | 0             | 0               | 0              |           |            |
|                            |                                                                         | Ultrasound Synovitis (Y/N)                                                | 1 (25)                    | 2 (50.0)      | 0               | 0              |           |            |
|                            |                                                                         | Contrast-Enhanced Ultrasound<br>(CEUS)                                    | 1 (25)                    | 0             | 0               | 0              |           |            |
|                            |                                                                         | 0                                                                         | 0                         | 1 (25.0)      | 0               | 0              |           |            |
|                            |                                                                         | 0                                                                         | 0                         | 1 (25.0)      | 0               | 0              |           |            |
|                            |                                                                         | MAdrid Sonographic Enthesitis<br>Index (MASEI)                            | 0                         | 0             | 0               | 1 (100)        |           |            |
|                            |                                                                         | Glasgow Ultrasound Enthesitis<br>Scoring System (GUESS)                   | 0                         | 0             | 0               | 1 (100)        |           |            |
|                            |                                                                         | Ultrasound entheses (thickening,<br>calcification, fluid, erosion, PD)    | 0                         | 0             | 0               | 1 (100)        |           |            |
|                            |                                                                         | Ultrasound dactylitis (Y/N, PD)                                           | 0                         | 0             | 0               | 1 (100)        |           |            |
|                            |                                                                         | Ultrasound joints (synovitis,<br>erosion, joint space narrowing,<br>PD)   | 0                         | 0             | 0               | 1 (100)        |           |            |
|                            |                                                                         | MRI (pelvis, hips, spine, peripheral<br>joints)                           |                           |               |                 |                |           |            |
|                            |                                                                         | <b>Participation</b>                                                      |                           | <b>3</b>      | <b>1 (4.5)</b>  | <b>1 (3.7)</b> | <b>0</b>  | <b>Yes</b> |
|                            |                                                                         | Participation                                                             | AIMS2 -Social             | 1 (100)       | 0               | 0              | 0         |            |
|                            |                                                                         |                                                                           | Social Role Participation | 0             | 1 (100)         | 0              | 0         |            |

|                                          |                                         |                                                                           |                                              |                 |                 |                |  |
|------------------------------------------|-----------------------------------------|---------------------------------------------------------------------------|----------------------------------------------|-----------------|-----------------|----------------|--|
|                                          | Questionnaire (SRPQ)                    | 0                                                                         | 1 (100)                                      | 0               |                 |                |  |
|                                          | Keele Assessment of Participation (KAP) |                                                                           |                                              |                 |                 |                |  |
|                                          | <b>"Tissue analysis"</b>                | <b>0</b>                                                                  | <b>0</b>                                     | <b>0</b>        | <b>0</b>        |                |  |
| <b>Other Domains not in the Core Set</b> | <b>Productivity</b>                     | <b>15</b>                                                                 | <b>7 (31.8)</b>                              | <b>5 (18.5)</b> | <b>4 (33.3)</b> |                |  |
|                                          | Productivity                            |                                                                           |                                              |                 |                 |                |  |
|                                          |                                         | Impact of PsA on Work                                                     | 2 (28)                                       | 0               | 0               |                |  |
|                                          |                                         | Productivity (VAS)                                                        | 1 (14)                                       | 2 (40.0)        | 0               |                |  |
|                                          |                                         | Work Limitations Questionnaire (WLQ)                                      | 1 (14)                                       | 0               | 0               |                |  |
|                                          |                                         | Work Productivity Survey (WPS)                                            | 1 (14)                                       | 0               | 0               |                |  |
|                                          |                                         | Productivity Score (VAS)                                                  |                                              |                 |                 |                |  |
|                                          |                                         | Change in Employment Due to Arthritis/Psoriasis Symptoms (Y/N)            | 1 (14)                                       | 0               | 1 (25)          |                |  |
|                                          |                                         | Sick Days (number of sick days/month)                                     | 1 (14)                                       | 0               | 0               |                |  |
|                                          |                                         |                                                                           | 0                                            | 1 (20.0)        | 1 (25)          |                |  |
|                                          |                                         | AIMS2 –Role                                                               | 0                                            | 1 (20.0)        | 0               |                |  |
|                                          |                                         | Work Productivity and Activity Impairment (WPAI)                          | 0                                            | 1 (20.0)        | 0               |                |  |
|                                          |                                         | Questionnaire Assessment of Work-Related Factors (QAWRF)                  | 0                                            | 1 (20.0)        | 0               |                |  |
|                                          |                                         | Health and Labour Questionnaire (HLQ)                                     | 0                                            | 1 (20.0)        | 0               |                |  |
|                                          |                                         |                                                                           | 0                                            | 0               | 1 (25)          |                |  |
|                                          |                                         |                                                                           | 0                                            | 0               | 1 (25)          |                |  |
|                                          |                                         | Difficulties at Work (Y/N)                                                |                                              |                 |                 |                |  |
|                                          |                                         | Work Absenteeism                                                          |                                              |                 |                 |                |  |
|                                          |                                         | Working Status (Work Disability Y/N)                                      |                                              |                 |                 |                |  |
|                                          |                                         | Disability Pension (Y/N)                                                  |                                              |                 |                 |                |  |
|                                          |                                         | Productivity losses (absenteeism due to health-related absence from work) |                                              |                 |                 |                |  |
|                                          |                                         | <b>Stiffness</b>                                                          | <b>4</b>                                     | <b>4 (18.2)</b> | <b>4 (14.8)</b> | <b>1 (8.3)</b> |  |
|                                          |                                         | Stiffness                                                                 |                                              |                 |                 |                |  |
|                                          |                                         |                                                                           | Duration of Morning Stiffness                | 3 (75)          | 2 (50)          | 0              |  |
|                                          |                                         |                                                                           | Morning Stiffness Lasting 45 Minutes         | 1 (25)          | 0               | 0              |  |
|                                          |                                         |                                                                           |                                              | 0               | 1 (25)          | 1 (100)        |  |
|                                          |                                         |                                                                           | BASDAI item #6 Duration of Morning Stiffness | 0               | 1 (25)          | 0              |  |
|                                          |                                         | Patient Assessment of Morning                                             |                                              |                 |                 |                |  |

|                      |                                                      | Stiffness (VAS) |                |                |              |            |
|----------------------|------------------------------------------------------|-----------------|----------------|----------------|--------------|------------|
| <b>Anxiety</b>       |                                                      | <b>1</b>        | <b>2 (9.1)</b> | <b>1 (3.7)</b> | <b>0 (0)</b> | <b>Yes</b> |
| Anxiety              | Hospital Anxiety and Depression Scale (HADS)-Anxiety |                 | 2 (100)        | 1 (100)        | 0            |            |
| <b>Depression</b>    |                                                      | <b>2</b>        | <b>2 (9.1)</b> | <b>2 (7.4)</b> | <b>0 (0)</b> | <b>Yes</b> |
| Depression           | HADS-Depression                                      |                 | 2 (100)        | 1 (50)         | 0            |            |
|                      | PSAQoL item #4 "I can't do the things I want to do"  |                 | 0              | 1 (50)         | 0            |            |
| <b>Coping</b>        |                                                      | <b>2</b>        | <b>1 (4.5)</b> | <b>0</b>       | <b>0</b>     | <b>Yes</b> |
| Coping               | Patient Activation Measure (PAM)                     |                 | 1 (100)        | 0              | 0            |            |
|                      | ASES -Other Symptom Subscale                         |                 | 1 (100)        | 0              | 0            |            |
| <b>Well-Being</b>    |                                                      | <b>1</b>        | <b>1 (4.5)</b> | <b>0</b>       | <b>0</b>     | <b>No</b>  |
| Well-Being           | Arizona Integrative Outcomes Scale (AIOS)            |                 | 1 (100)        | 0              | 0            |            |
| <b>Self-Efficacy</b> |                                                      | <b>1</b>        | <b>0</b>       | <b>1 (3.7)</b> | <b>0</b>     | <b>No</b>  |
| Self-Efficacy        | ASES                                                 |                 | 0              | 1 (100)        | 0            |            |
| <b>Sleep</b>         |                                                      | <b>1</b>        | <b>0</b>       | <b>1 (3.7)</b> | <b>0</b>     | <b>Yes</b> |
| Sleeping Disturbance | Sleeping disorder due to night pain (0-3)            |                 | 0              | 1 (100)        | 0            |            |

Table 2a is the complete original version of abbreviated Table 2 provided in text (due to space considerations). Domains and outcome measures are listed in decreasing order of frequency of assessment in RCTs. Abbreviations not listed in Table 2: VAS Visual Analog Scale; Y/N Yes/No; NRS Numerical Rating Scale, SJC Swollen Joint Count; TJC Tender Joint Count; RADAI Rheumatoid Arthritis Disease Activity Index; NPF-PS National Psoriasis Foundation Psoriasis Score calculated as: Severity (score of 0-5 for average of erythema, induration, scaling)\*Body Surface Area (score of 0-5); BASDAI Bath Ankylosing Spodylitis Activity Index; RA Rheumatoid Arthritis; BASFI Bath Ankylosing Spondylitis Functional Index; DLQI Dermatology Life Quality Index; Likert 5 point scale; We listed in quotation marks “ “ items listed in the 2006 PsA core set that do not represent actual domains rather modalities of assessment (eg: Radiology, MRI, Tissue analysis, Acute phase reactants).
